# Supplementary material for: Sequence-specific DNA binding by MYC/MAX to low-affinity non-E-box motifs
Source: PubMed Central journal article supplement (PMC5515408; doi:10.1371/journal.pone.0180147), 2017-07-18
Supplement: pone.0180147.s001.pdf [file pone.0180147.s001.pdf]

# MAX:MAX

# MYC:MAX

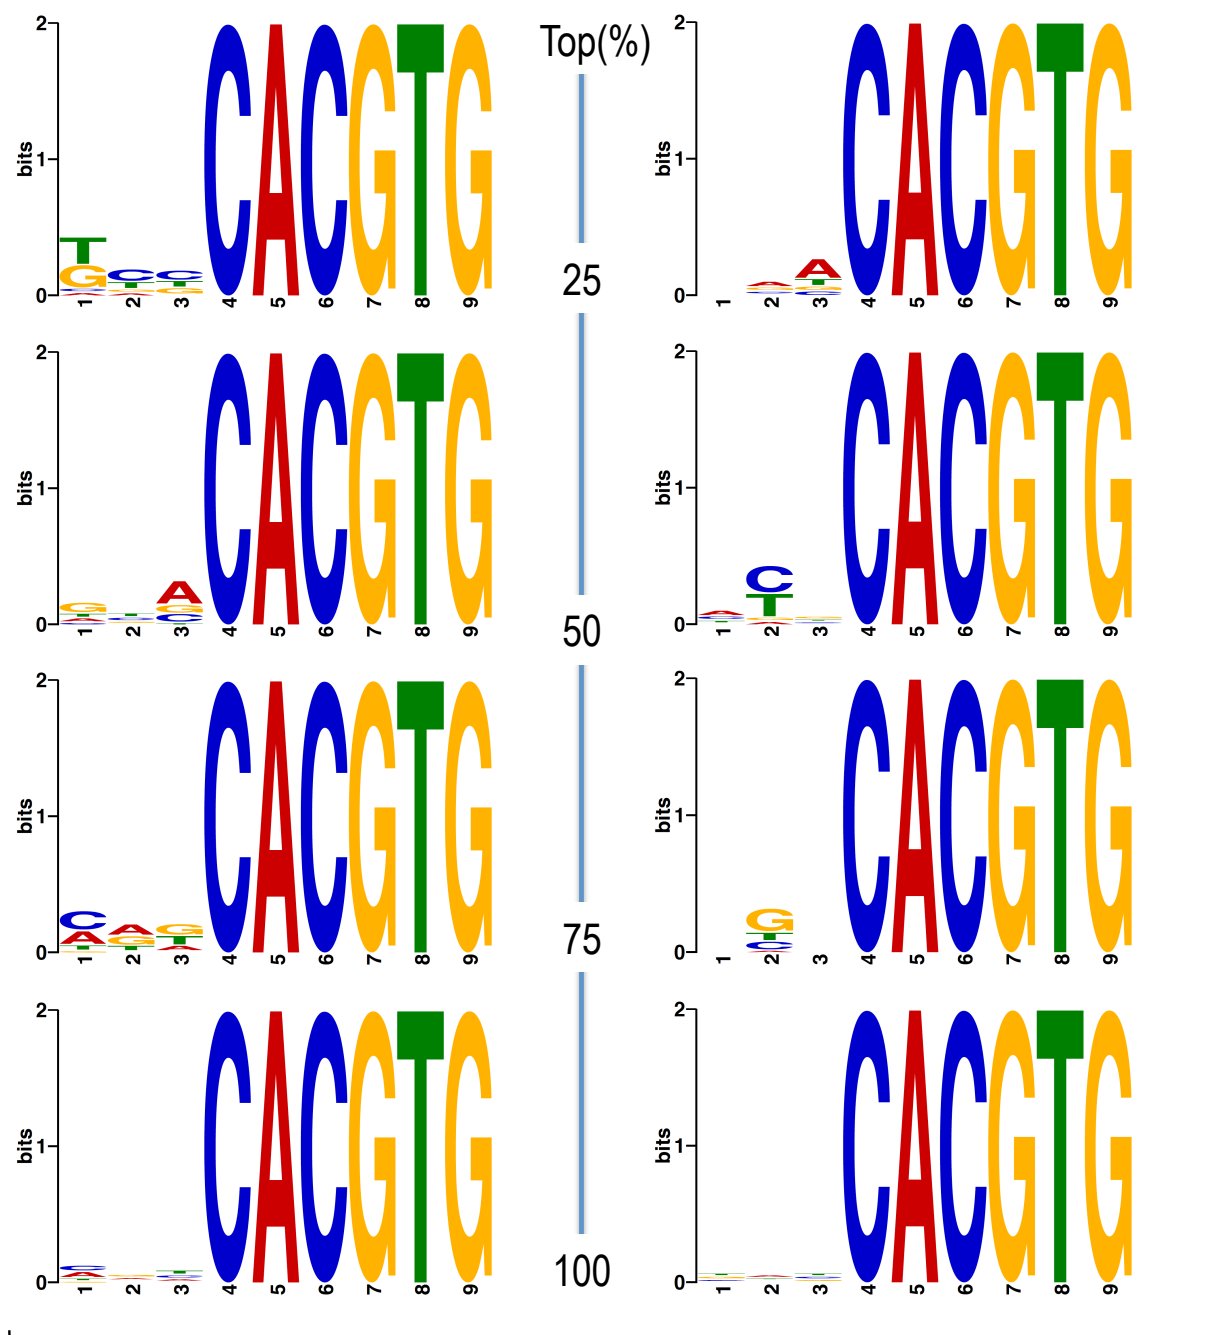

nnnCACGTGgta
