# Supplementary material for: Sequence-specific DNA binding by MYC/MAX to low-affinity non-E-box motifs
Source: PubMed Central journal article supplement (PMC5515408; doi:10.1371/journal.pone.0180147), 2017-07-18

**A**

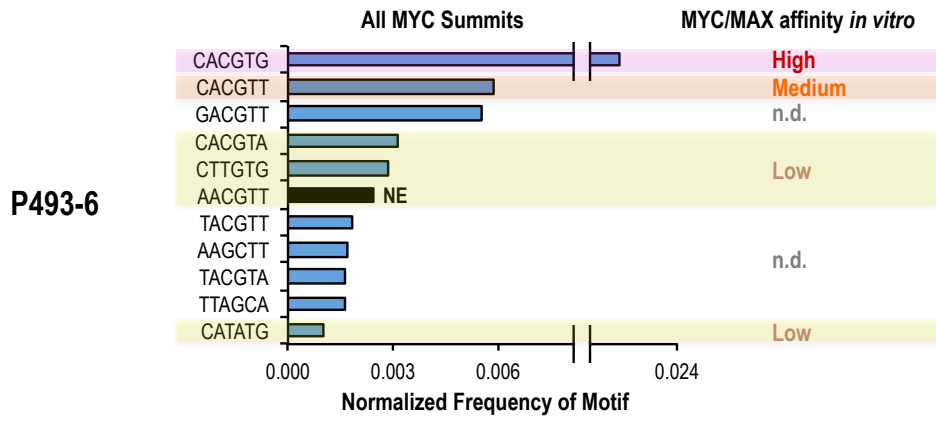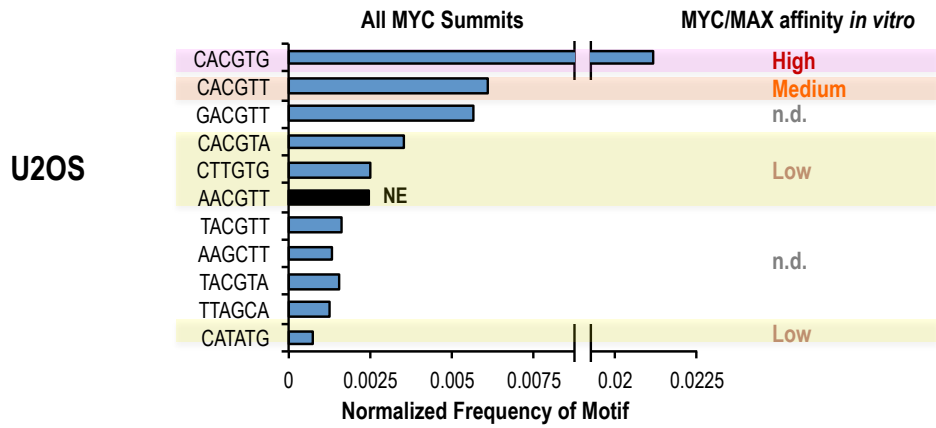

**B**

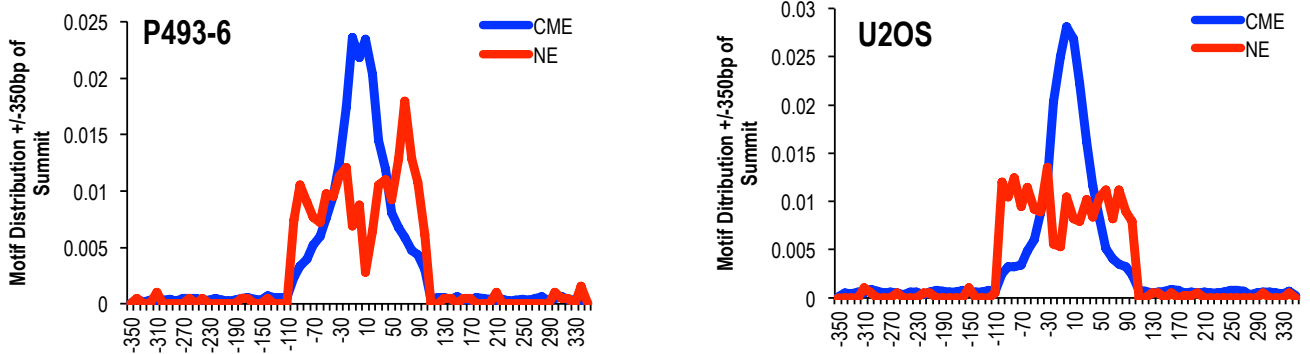

**C**

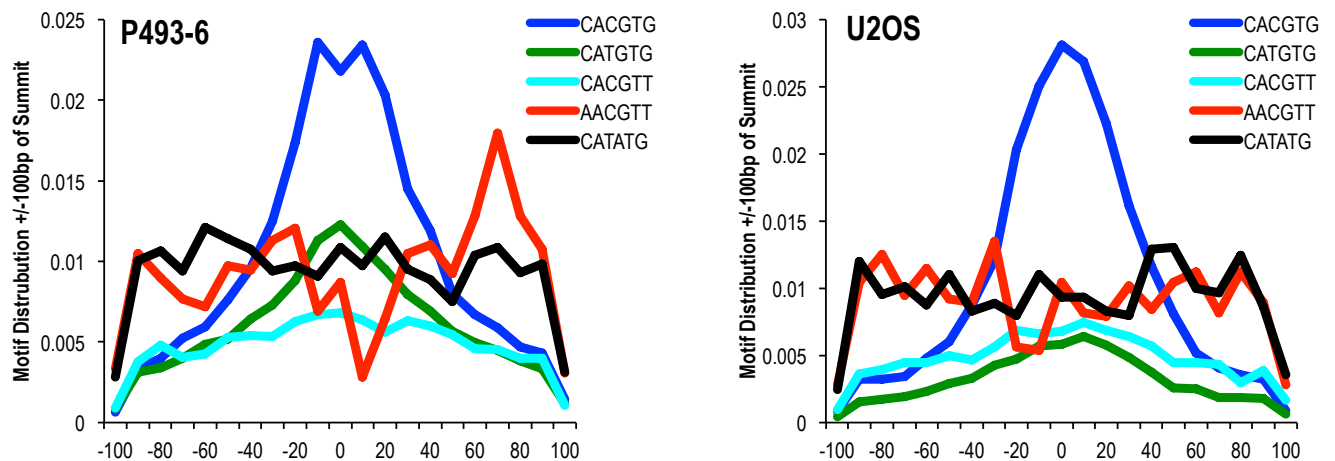

Supplement: pone.0180147.s005.pdf [file pone.0180147.s005.pdf]
