# Supplementary material for: Sequence-specific DNA binding by MYC/MAX to low-affinity non-E-box motifs
Source: PubMed Central journal article supplement (PMC5515408; doi:10.1371/journal.pone.0180147), 2017-07-18

# Promoter +/-2kB

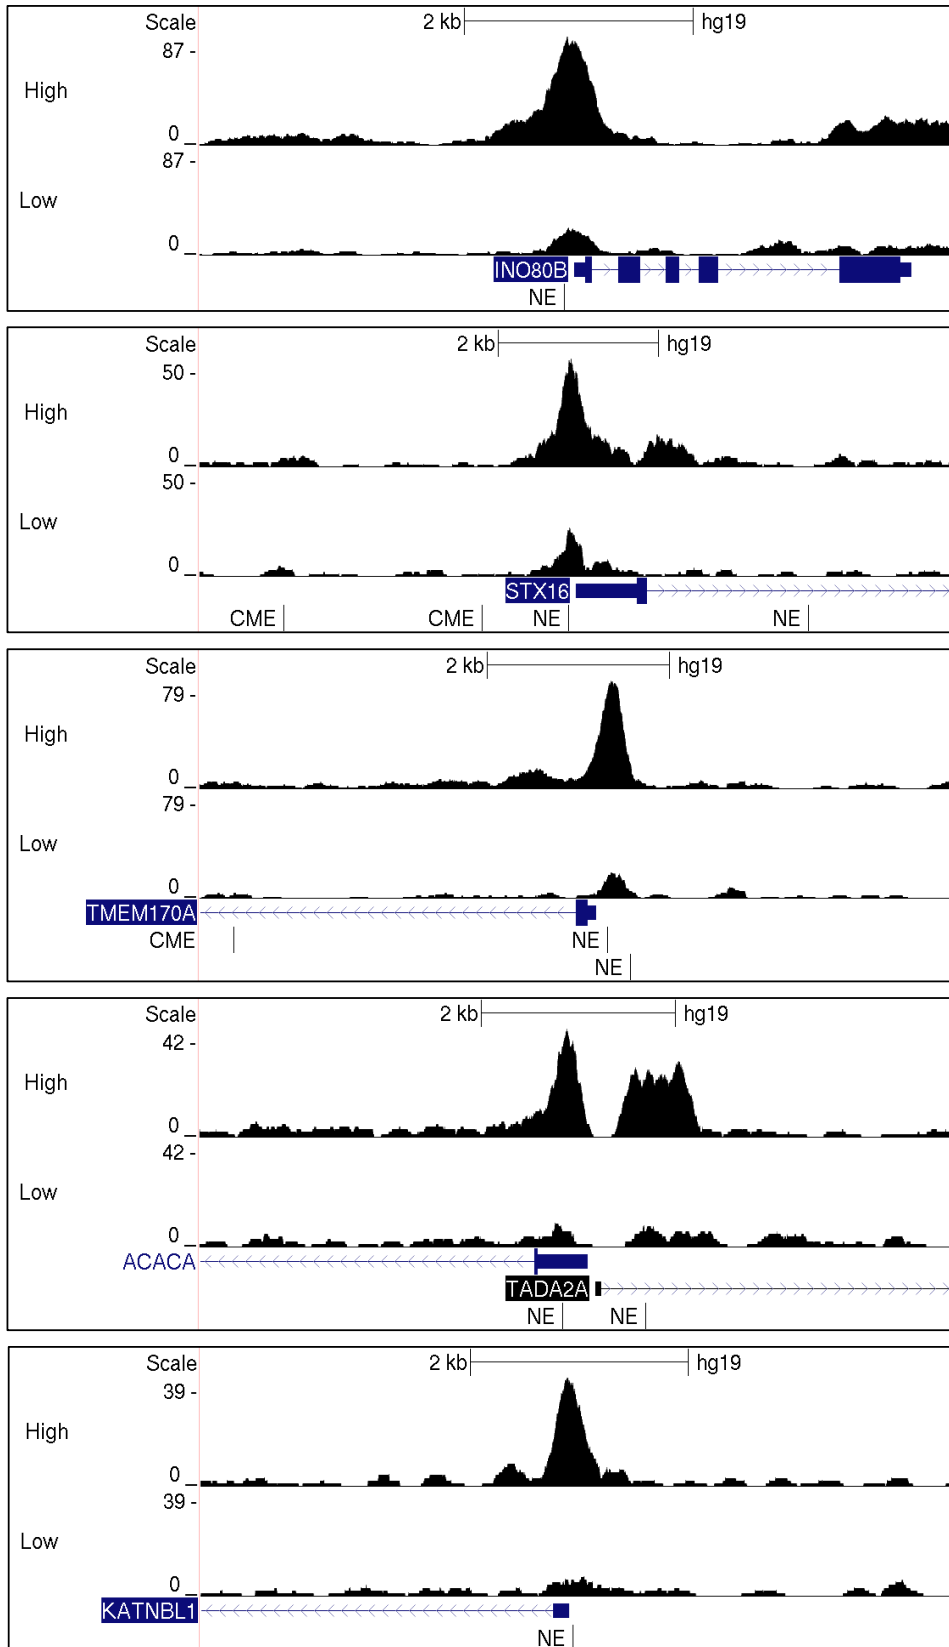

# Promoter +/-2kB

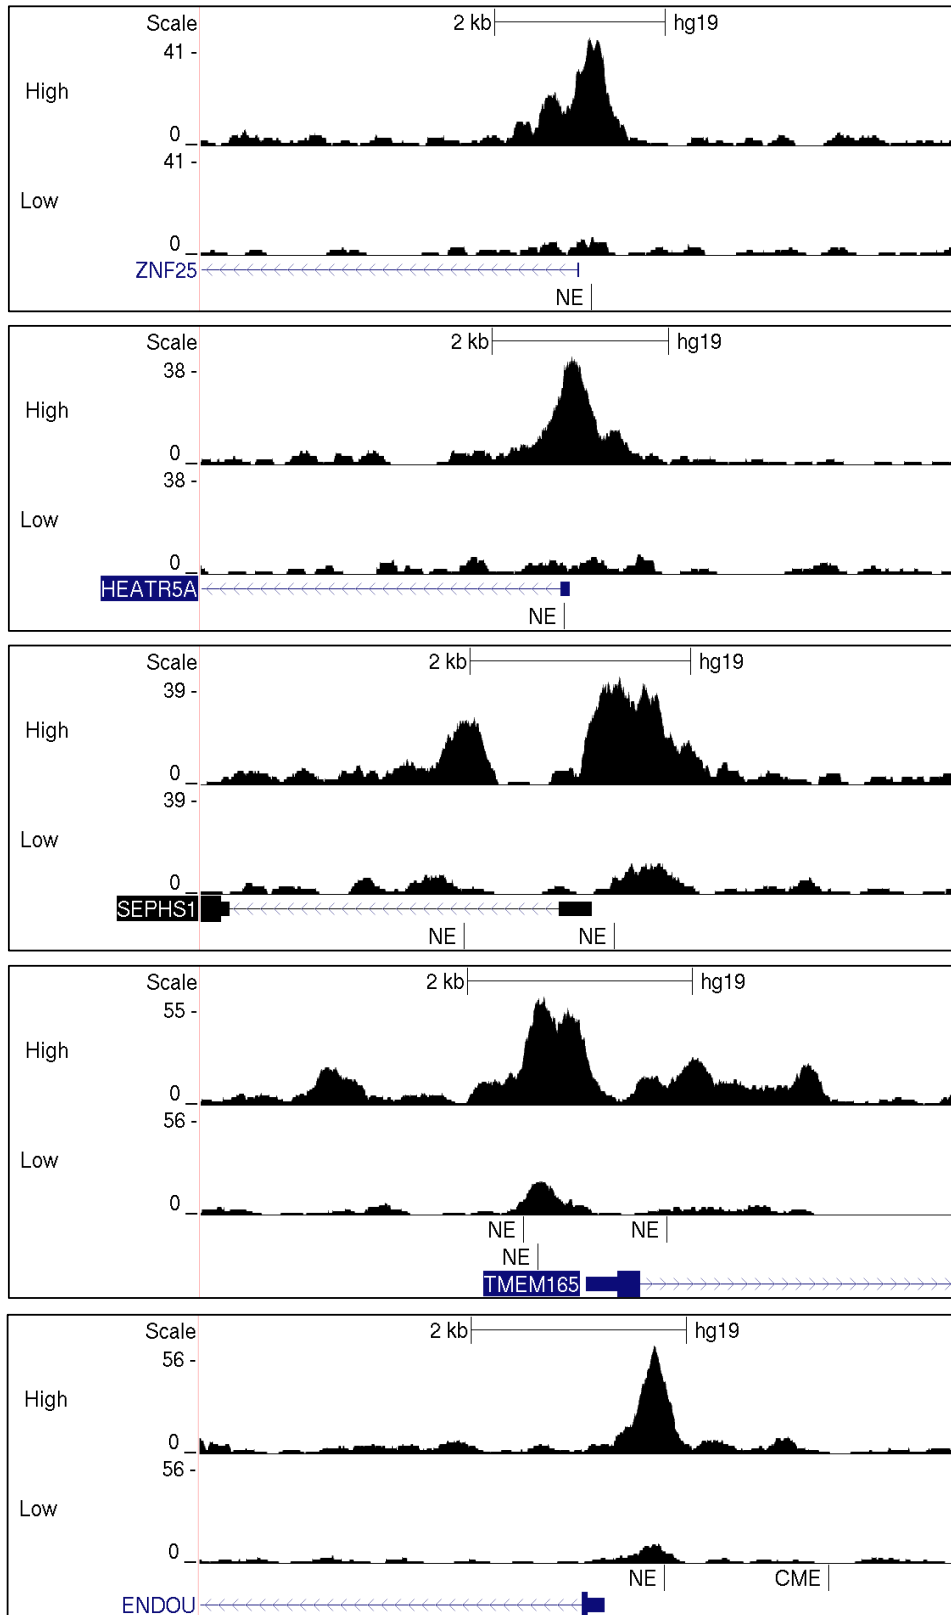

# Intergenic

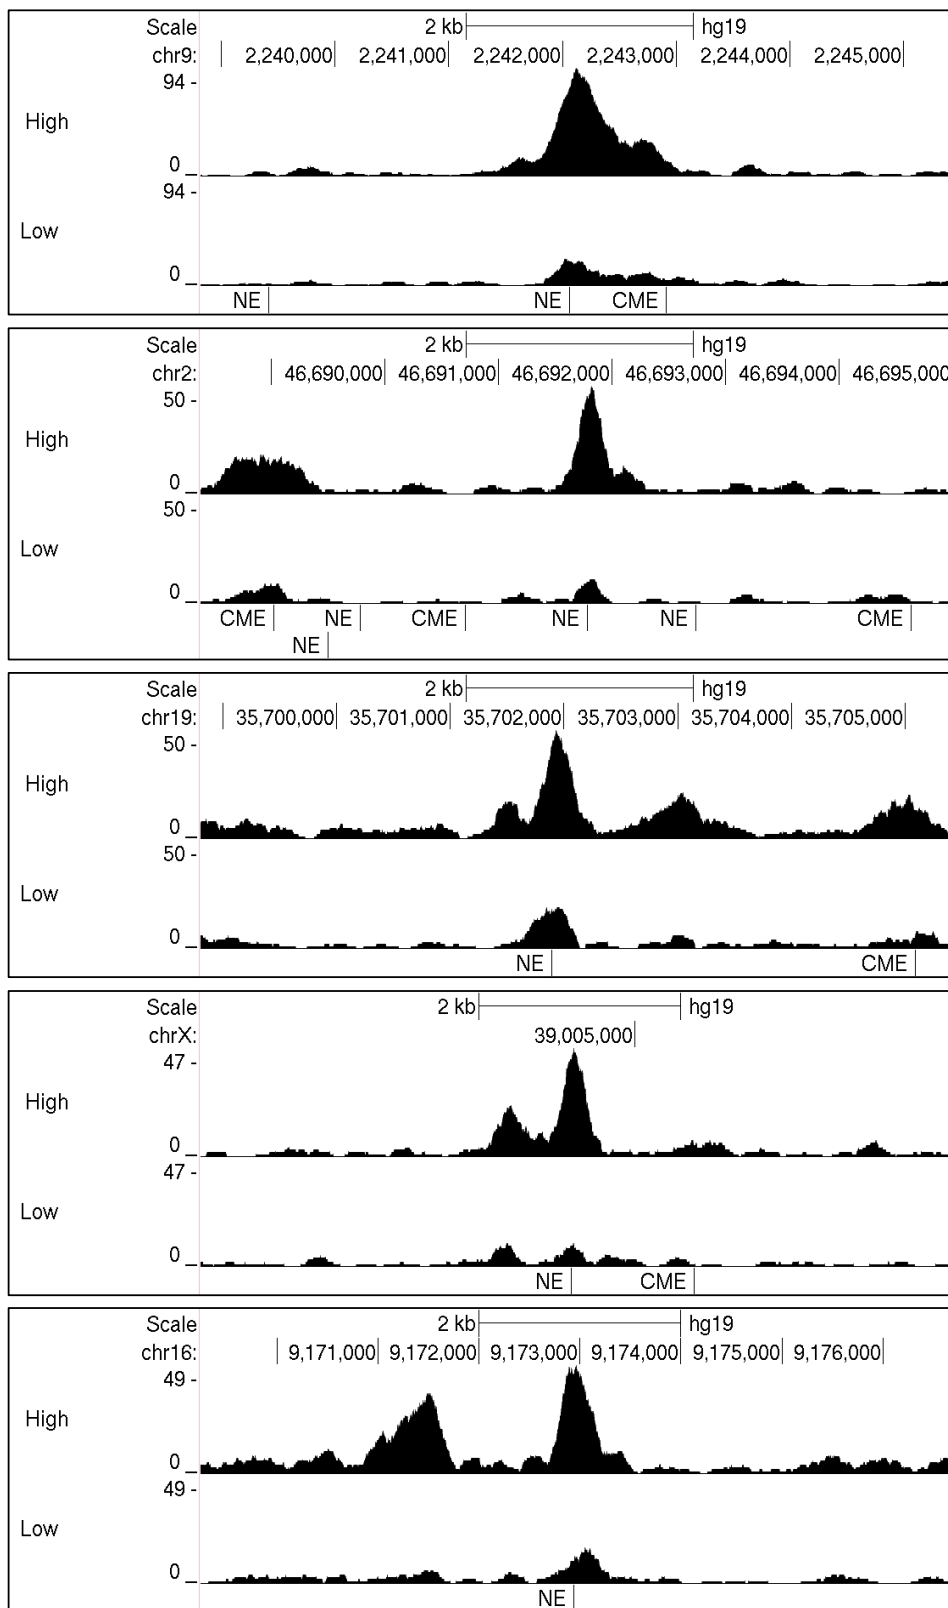

# Intragenic

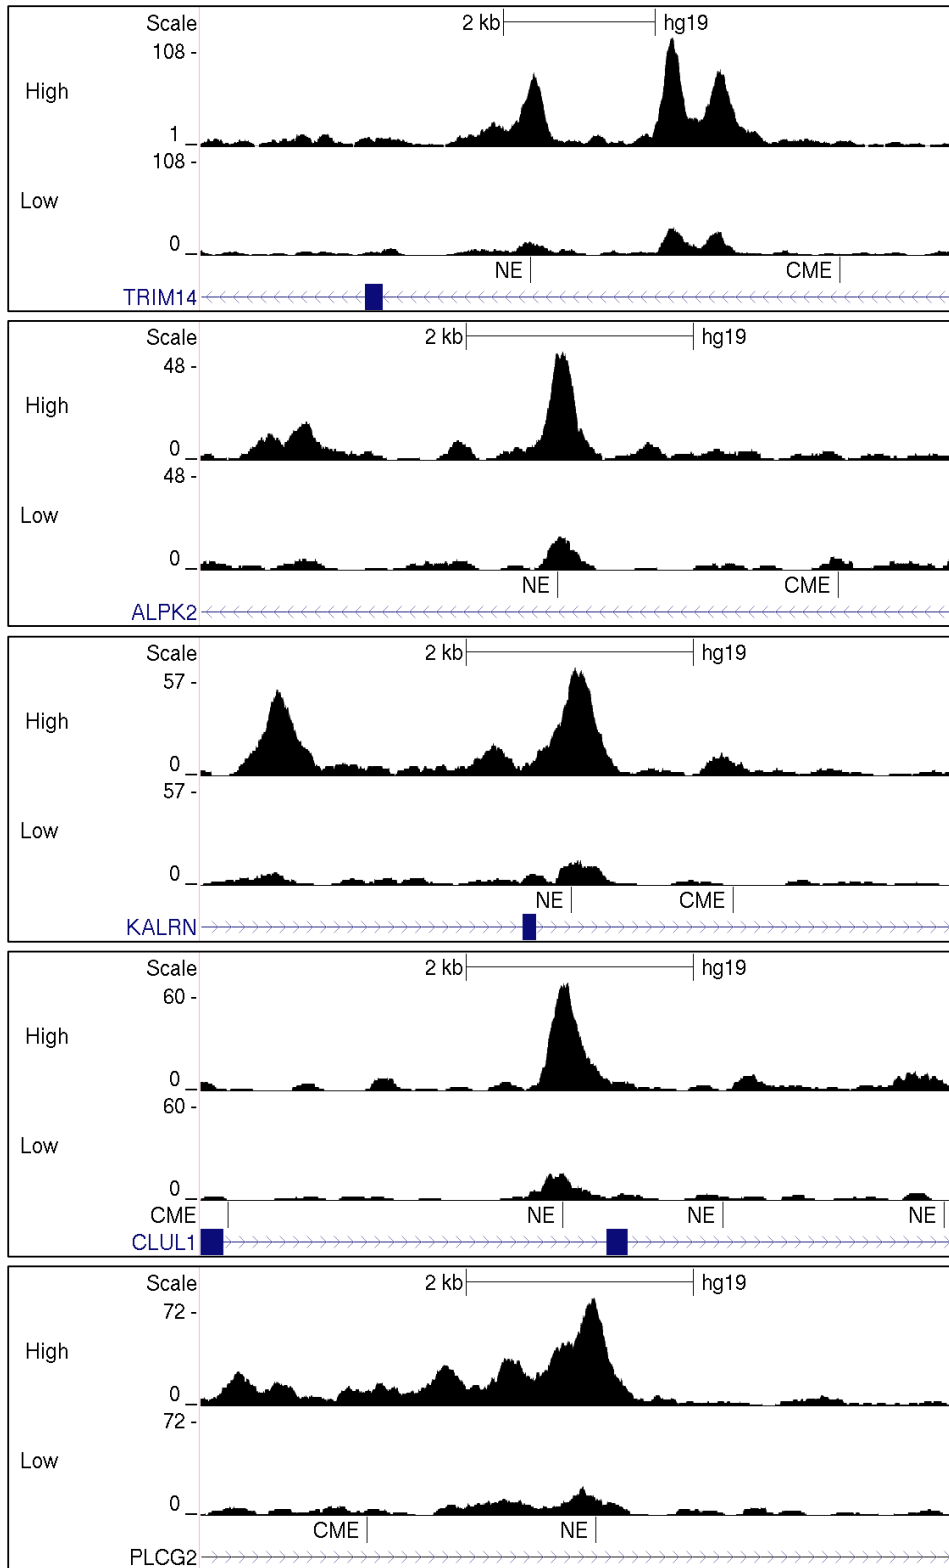

Supplement: pone.0180147.s006.pdf [file pone.0180147.s006.pdf]
